# Supplementary material for: Macrostructural and Microstructural White Matter Alterations Are Associated with Apathy across the Clinical Alzheimer’s Disease Spectrum
Source: MDPI journal article supplement (doi:10.3390/brainsci12101383), 2022-10-13
Supplement: s1 [file s1]

**Table S1.** Differences in the prevalence of individual neuropsychiatric symptoms (other than apathy) between patient groups (*Chi-square* test). All values are frequencies (proportions).

| Symptom                   | AP-PT ( <i>n</i> = 61) | NA-PT ( <i>n</i> = 61) | F              | <i>p</i> |
|---------------------------|------------------------|------------------------|----------------|----------|
| Delusions                 | 6 (9.8%)               | 1 (1.6%)               | – <sup>a</sup> | 0.114    |
| Hallucinations            | 1 (1.6%)               | 0 (0.0 %)              | – <sup>a</sup> | 1.000    |
| Agitation                 | 27 (44.3%)             | 12 (19.7%)             | 8.48           | 0.004    |
| Depression                | 37 (60.6%)             | 11 (18.0%)             | 23.22          | <0.001   |
| Anxiety                   | 21 (34.4%)             | 9 (14.7%)              | 6.36           | 0.012    |
| Euphoria                  | 6 (9.8%)               | 1 (1.6%)               | – <sup>a</sup> | 0.114    |
| Disinhibition             | 16 (26.2%)             | 1 (1.6%)               | 15.38          | <0.001   |
| Irritability              | 37 (60.6%)             | 10 (16.4%)             | 25.23          | <0.001   |
| Aberrant motor behaviours | 10 (16.4%)             | 0 (0.0 %)              | 10.89          | <0.001   |
| Night-time behaviours     | 23 (37.7%)             | 15 (24.6%)             | 2.45           | 0.118    |
| Appetite                  | 16 (26.2%)             | 6 (9.8%)               | 5.54           | 0.019    |

<sup>a</sup> *Fisher's Exact Test*

**Table S2.** Differences in the prevalence of health issues in the medical history of participant groups (*Chi-square* test). All values are frequencies (proportions).

| Comorbid health conditions  | AP-PT ( <i>n</i> = 61) | NA-PT ( <i>n</i> = 61) | CU ( <i>n</i> = 61) | F     | <i>p</i> |
|-----------------------------|------------------------|------------------------|---------------------|-------|----------|
| Psychiatric                 | <b>34 (55.7%)*</b>     | <b>20 (32.8%)</b>      | 12 (19.7%)          | 17.63 | <0.001   |
| Neurologic (other than AD)  | 12 (19.7%)             | 13 (21.3%)             | 13 (21.3%)          | 0.07  | 0.967    |
| Head, eyes, nose and throat | 34 (55.7%)             | 42 (68.9%)             | 37 (60.7%)          | 2.27  | 0.322    |
| Cardiovascular              | 46 (75.4%)             | 42 (68.9%)             | 44 (72.1%)          | 0.65  | 0.722    |
| Respiratory                 | 17 (27.9%)             | 14 (23.0%)             | 7 (11.5%)           | 5.24  | 0.073    |
| Hepatic                     | 2 (3.3%)               | 2 (3.3%)               | 1 (1.6%)            | 0.41  | 0.814    |
| Dermatologic                | 22 (36.1%)             | 16 (26.2%)             | 18 (29.5%)          | 1.44  | 0.487    |
| Musculoskeletal             | 40 (65.6%)             | 38 (62.3%)             | 42 (68.9%)          | 0.58  | 0.748    |
| Endocrine-Metabolic         | 32 (52.5%)             | 26 (42.6%)             | 34 (55.7%)          | 2.27  | 0.321    |
| Gastrointestinal            | 22 (36.1%)             | 30 49.2%)              | 28 (45.9%)          | 2.31  | 0.315    |
| Hematopoietic-Lymphatic     | 4 (6.6%)               | 5 (8.2%)               | 7 (11.5%)           | 0.96  | 0.619    |
| Renal-Genitourinary         | 18 (29.5%)             | 25 (41.5%)             | 20 (32.8%)          | 1.89  | 0.389    |
| Allergies-Drug sensitivity  | 24 (39.3%)             | 30 49.2%)              | 26 (42.6%)          | 1.24  | 0.537    |
| Alcohol abuse               | 2 (3.3%)               | 0 (0.0%)               | 1 (1.6%)            | 2.03  | 0.362    |
| Drug abuse                  | 0 (0.0%)               | 0 (0.0%)               | 0 (0.0%)            | 0.00  | 1.000    |
| Smoking                     | 25 (41.5%)             | 26 (42.6%)             | 28 (45.9%)          | 0.31  | 0.856    |
| Malignancy                  | 20 (32.8%)             | 14 (23.0%)             | 18 (29.5%)          | 1.50  | 0.471    |

|                           |            |            |            |      |       |
|---------------------------|------------|------------|------------|------|-------|
| Major Surgical procedures | 46 (75.4%) | 43 (70.5%) | 42 (68.9%) | 0.70 | 0.705 |
|---------------------------|------------|------------|------------|------|-------|

AD: Alzheimer's disease

\* Patient group significantly different from the CU group in pairwise *post hoc* comparisons

In bold, significant difference between patient groups in pairwise *post hoc* comparisons

**Table S3.** Differences in the prevalence of mental health problems in the medical history of participant groups (*Chi-square* test). All values are frequencies (proportions).

| Symptoms                    | AP-PT ( <i>n</i> = 61) | NA-PT ( <i>n</i> = 61) | CU ( <i>n</i> = 61) | F                 | <i>p</i> |
|-----------------------------|------------------------|------------------------|---------------------|-------------------|----------|
| Depression                  | 28 (45.9%)*            | 18 (29.5%)*            | 8 (13.1%)           | 15.76             | <0.001   |
| Insomnia                    | 4 (6.6%)               | 4 (6.6%)               | 1 (1.6%)            | 2.51 <sup>a</sup> | 0.285    |
| Nervous breakdown           | 1 (1.6%)               | 0 (0.0%)               | 0 (0.0%)            | 2.21 <sup>a</sup> | 0.332    |
| Anxiety                     | 5 (8.2%)               | 3 (4.9%)               | 2 (3.3%)            | 1.46 <sup>a</sup> | 0.482    |
| Irritability                | 1 (1.6%)               | 1 (1.6%)               | 0 (0.0%)            | 1.63 <sup>a</sup> | 0.442    |
| Seasonal affective disorder | 0 (0.0%)               | 0 (0.0%)               | 1 (1.6%)            | 2.21              | 0.332    |

<sup>a</sup> Likelihood ratio

\* Patient groups significantly different from the CU group in pairwise *post hoc* comparisons

**Table S4.** Differences in the prevalence of medications with a potential impact on apathy across participant groups (*Chi-square* test). All values are frequencies (proportions).

| Treatment                     | AP-PT ( <i>n</i> = 61) | NA-PT ( <i>n</i> = 61) | CU ( <i>n</i> = 61) | F                 | <i>p</i> |
|-------------------------------|------------------------|------------------------|---------------------|-------------------|----------|
| AChEI                         | 33 (54.1%)*            | 25 (41.0%)*            | 0 (0.0 %)           | 44.88             | <0.001   |
| Memantine                     | <b>17 (27.9%)*</b>     | <b>8 (13.1%)*</b>      | 0 (0.0 %)           | 20.11             | <0.001   |
| Antidepressants               | <b>23 (37.7%)*</b>     | <b>12 (19.7%)*</b>     | 3 (4.8%)            | 19.99             | <0.001   |
| Other behavioural medications | 2 (3.2%)               | 0 (0.0 %)              | 1 (1.6%)            | 2.81 <sup>a</sup> | 0.246    |

AChEI: Acetylcholinesterase inhibitors

<sup>a</sup> Likelihood ratio

\* Patient groups significantly different from the CU group in pairwise *post hoc* comparisons

In bold, significant difference between patient groups in pairwise *post hoc* comparisons

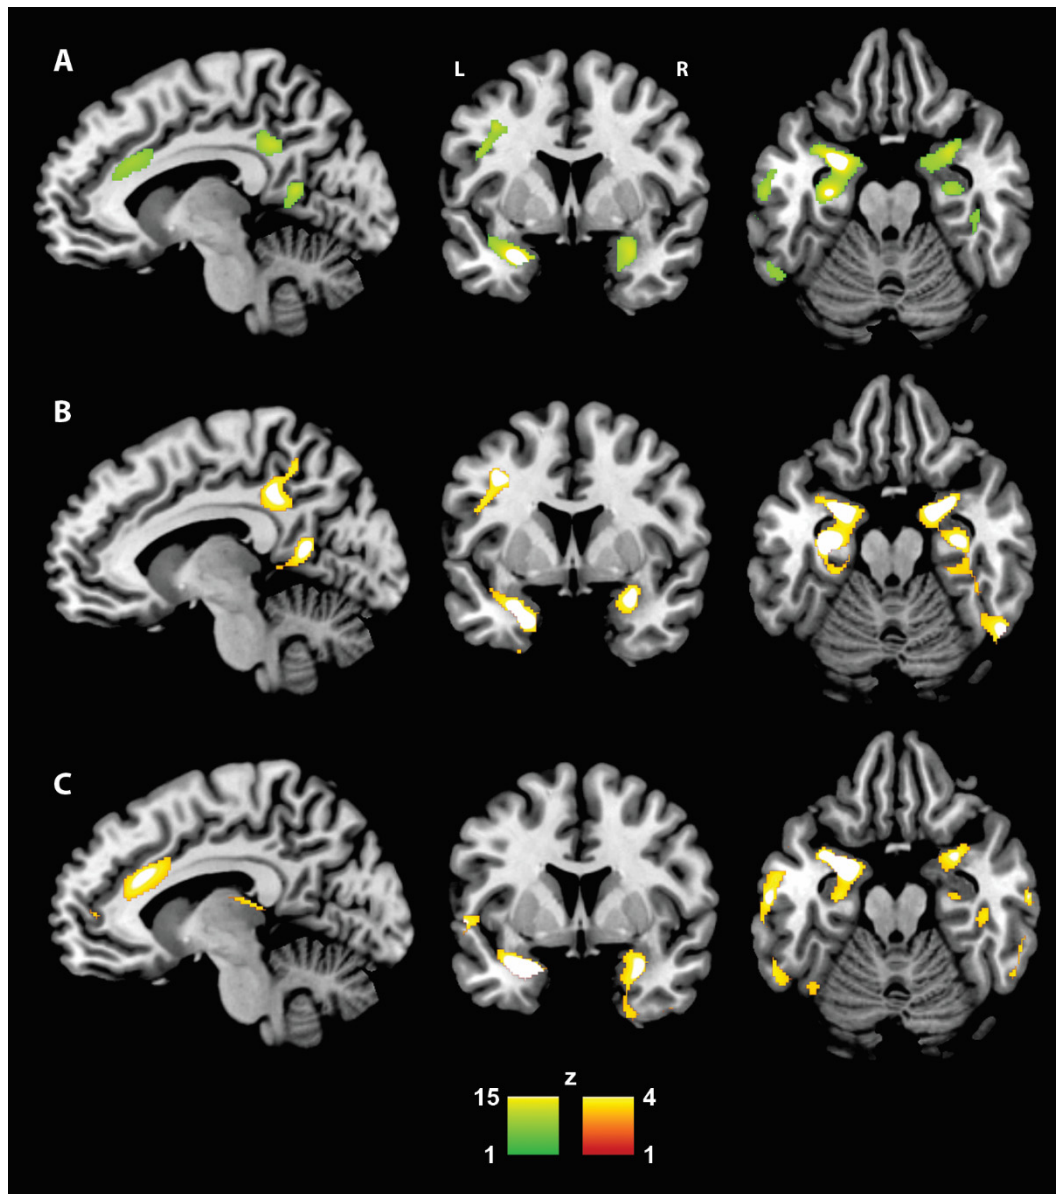

**Figure S1.** Significant regional GM volume differences (FWE-corrected at cluster level): A. *ANCOVA*; B. NA-PT < CU group; C. AP-PT < CU group.

**Abbreviation list.**

A $\beta$ : Amyloid beta, ACC: Anterior cingulate cortex, AChEI: Acetylcholinesterase inhibitors, AD: Alzheimer's disease, ADNI: Alzheimer's Disease Neuroimaging Initiative, ANCOVA: Analysis of covariance, ANOVA: Analysis of variance, AP-PT: Apathetic patients, ATR: Anterior thalamic radiations, AVLT: Auditory Verbal Learning Test, AxD: Axial diffusivity, BNT: Boston Naming Test, CDR: Clinical Dementia Rating, CDT: Clock Drawing Test, CFT-A: Category Fluency Test - animals, CSF: Cerebrospinal fluid, CU: Cognitively unimpaired, DR: Delayed recall, DTI: Diffusion tensor imaging, FA: Fractional anisotropy, FLAIR: Fluid-attenuated inversion recovery, FSL: Functional magnetic resonance imaging of the brain Software Library, FWE: Family-wise error, GM: Gray matter, GMV: Gray matter volume, ICBM: International Consortium for Brain Mapping, IFL: Inferior longitudinal fasciculus, IFOF: Inferior fronto-occipital fasciculus, IR: Immediate recall, LMT: Logical Memory Test, LST: Lesion Segmentation Toolbox, MCI: Mild cognitive impairment, MD: Mean diffusivity, MMSE: Mini Mental State Examination, MNI: Montreal Neurological Institute, NA-PT: Non-apathetic patients, NPI-Q: Neuropsychiatric Inventory Questionnaire, OFC: Orbitofrontal cortex, p-tau: Phosphorylated tau, PET: Positron emission tomography, PFC: Prefrontal cortex, RD: Radial diffusivity, SLF: Superior longitudinal fasciculus, SPM: Statistical Parametric Mapping, TBSS: Tract-based spatial statistics, TFCE: Threshold-free cluster enhanced, TIV: Total intracranial volume, TMT – A/B: Trail Making Test – part A/part B, VBM: Voxel-based morphometry, WM: White matter, WMH: White matter hyperintensity, WMHV: White matter hyperintensity volume, WMV: White matter volume
